# Supplementary material for: A new class of organic–inorganic single and double hybrid perovskites with a diammonium-halide-diammonium spacer layer
Source: Royal Society of Chemistry journal article supplement (doi:10.1039/d3ta04568d), 2023-01-01
Supplement: d3ta04568d1.pdf [file d3ta04568d1.pdf]

**A New Class of Organic-inorganic Single and Double Hybrid Perovskites with  
Diammonium-halide-diammonium Spacer Layer**

Walter P.D. Wong,<sup>[a]†</sup> Xinyun Wang,<sup>[a]†</sup> Rongrong Zhang,<sup>[a][b]</sup> Kian Ping Loh<sup>\*[a][b]</sup>

[a] Department of Chemistry, National University of Singapore 3 Science Drive 3, Singapore  
117543, Singapore

[b] Joint School of National University of Singapore and Tianjin University, International  
Campus of Tianjin University, Binhai New City, Fuzhou 350207, China

† Both authors contributed equally to this work

\*Corresponding author: [chmlhkp@nus.edu.sg](mailto:chmlhkp@nus.edu.sg)

Table S1: Summary of key single crystal XRD refinement parameters for (ED)<sub>4</sub>CuBiX<sub>12</sub>

| Identification code                                          | (ED) <sub>4</sub> CuBiBr <sub>12</sub>                             | (ED) <sub>4</sub> CuBiCl <sub>a</sub> Br <sub>12-<math>\alpha</math></sub>               | (ED) <sub>4</sub> CuBiCl <sub>4</sub> I <sub>8</sub>                               | (ED) <sub>4</sub> CuBiBr <sub>4</sub> I <sub>8</sub>                             |
|--------------------------------------------------------------|--------------------------------------------------------------------|------------------------------------------------------------------------------------------|------------------------------------------------------------------------------------|----------------------------------------------------------------------------------|
| Empirical formula                                            | C <sub>8</sub> H <sub>40</sub> BiBr <sub>12</sub> CuN <sub>8</sub> | C <sub>8</sub> H <sub>40</sub> BiBr <sub>10.18</sub> Cl <sub>1.82</sub> CuN <sub>8</sub> | C <sub>8</sub> H <sub>40</sub> BiCl <sub>4</sub> CuI <sub>8</sub> N <sub>8</sub>   | C <sub>8</sub> H <sub>40</sub> BiBr <sub>4</sub> CuI <sub>8</sub> N <sub>8</sub> |
| Formula weight                                               | 1479.92                                                            | 1399.00                                                                                  | 1678.00                                                                            | 1855.84                                                                          |
| Temperature/K                                                | 100(5)                                                             | 100(5)                                                                                   | 100(5)                                                                             | 100(5)                                                                           |
| Crystal system                                               | Triclinic                                                          | Triclinic                                                                                | Orthorhombic                                                                       | Monoclinic                                                                       |
| Space group                                                  | <i>P</i> $\bar{1}$                                                 | <i>P</i> $\bar{1}$                                                                       | <i>P</i> 2 <sub>1</sub> 2 <sub>1</sub> 2                                           | <i>P</i> 2 <sub>1</sub> / <i>m</i>                                               |
| <i>a</i> /Å                                                  | 9.0208(4)                                                          | 8.9118(12)                                                                               | 20.749(3)                                                                          | 8.9130(14)                                                                       |
| <i>b</i> /Å                                                  | 9.0364(5)                                                          | 8.9306(12)                                                                               | 9.0030(9)                                                                          | 22.030(4)                                                                        |
| <i>c</i> /Å                                                  | 11.1463(6)                                                         | 11.1342(13)                                                                              | 9.8332(12)                                                                         | 9.5776(14)                                                                       |
| $\alpha$ /°                                                  | 108.205(2)                                                         | 107.767(5)                                                                               | 90                                                                                 | 90                                                                               |
| $\beta$ /°                                                   | 93.991(2)                                                          | 94.121(5)                                                                                | 90                                                                                 | 91.570(5)                                                                        |
| $\gamma$ /°                                                  | 92.577(2)                                                          | 92.742(5)                                                                                | 90                                                                                 | 90                                                                               |
| Volume/Å <sup>3</sup>                                        | 858.89(8)                                                          | 839.43(19)                                                                               | 1836.9(4)                                                                          | 1879.9(5)                                                                        |
| <i>Z</i>                                                     | 1                                                                  | 1                                                                                        | 2                                                                                  | 2                                                                                |
| $\rho_{\text{calc}}$ /cm <sup>3</sup>                        | 2.861                                                              | 2.767                                                                                    | 3.034                                                                              | 3.279                                                                            |
| $\mu$ /mm <sup>-1</sup>                                      | 19.706                                                             | 18.142                                                                                   | 12.391                                                                             | 16.075                                                                           |
| <i>F</i> (000)                                               | 676.0                                                              | 643.0                                                                                    | 1496.0                                                                             | 1640.0                                                                           |
| Crystal size/mm <sup>3</sup>                                 | 0.190 × 0.110 × 0.090                                              | 0.14 × 0.078 × 0.062                                                                     | 0.067 × 0.065 × 0.031                                                              | 0.077 × 0.058 × 0.051                                                            |
| Radiation                                                    | MoK $\alpha$ ( $\lambda$ = 0.71073)                                | MoK $\alpha$ ( $\lambda$ = 0.71073)                                                      | MoK $\alpha$ ( $\lambda$ = 0.71073)                                                | MoK $\alpha$ ( $\lambda$ = 0.71073)                                              |
| 2 $\theta$ range for data collection/°                       | 5.694 to 52.748                                                    | 4.594 to 49.474                                                                          | 4.584 to 49.444                                                                    | 4.932 to 52.744                                                                  |
| Index ranges                                                 | -11 ≤ <i>h</i> ≤ 11,<br>-11 ≤ <i>k</i> ≤ 10,<br>0 ≤ <i>l</i> ≤ 13  | -10 ≤ <i>h</i> ≤ 10,<br>-10 ≤ <i>k</i> ≤ 10,<br>-13 ≤ <i>l</i> ≤ 13                      | -24 ≤ <i>h</i> ≤ 24,<br>-10 ≤ <i>k</i> ≤ 10,<br>-11 ≤ <i>l</i> ≤ 11                | -11 ≤ <i>h</i> ≤ 11,<br>0 ≤ <i>k</i> ≤ 27,<br>0 ≤ <i>l</i> ≤ 11                  |
| Reflections collected                                        | 3457                                                               | 21039                                                                                    | 17363                                                                              | 3909                                                                             |
| Independent reflections                                      | 3457<br>[ <i>R</i> <sub>sigma</sub> = 0.0452]                      | 2863<br>[ <i>R</i> <sub>int</sub> = 0.0953,<br><i>R</i> <sub>sigma</sub> = 0.0528]       | 3148<br>[ <i>R</i> <sub>int</sub> = 0.0849,<br><i>R</i> <sub>sigma</sub> = 0.0535] | 3909<br>[ <i>R</i> <sub>sigma</sub> = 0.0736]                                    |
| Data/restraints/parameters                                   | 3457/0/160                                                         | 2863/0/151                                                                               | 3148/43/152                                                                        | 3909/54/150                                                                      |
| Goodness-of-fit on <i>F</i> <sup>2</sup>                     | 1.045                                                              | 1.028                                                                                    | 1.034                                                                              | 1.096                                                                            |
| Final <i>R</i> indexes [ <i>I</i> ≥ 2 $\sigma$ ( <i>I</i> )] | <i>R</i> <sub>1</sub> = 0.0310,<br><i>wR</i> <sub>2</sub> = 0.0732 | <i>R</i> <sub>1</sub> = 0.0319,<br><i>wR</i> <sub>2</sub> = 0.0693                       | <i>R</i> <sub>1</sub> = 0.0323,<br><i>wR</i> <sub>2</sub> = 0.0620                 | <i>R</i> <sub>1</sub> = 0.0600,<br><i>wR</i> <sub>2</sub> = 0.1299               |
| Final <i>R</i> indexes [all data]                            | <i>R</i> <sub>1</sub> = 0.0356,<br><i>wR</i> <sub>2</sub> = 0.0757 | <i>R</i> <sub>1</sub> = 0.0436,<br><i>wR</i> <sub>2</sub> = 0.0752                       | <i>R</i> <sub>1</sub> = 0.0389,<br><i>wR</i> <sub>2</sub> = 0.0661                 | <i>R</i> <sub>1</sub> = 0.0780,<br><i>wR</i> <sub>2</sub> = 0.1377               |
| Largest diff. peak/hole / e Å <sup>-3</sup>                  | 1.88/-1.34                                                         | 1.58/-1.20                                                                               | 0.96/-1.02                                                                         | 3.01/-2.48                                                                       |

Table S2: Summary of key single crystal XRD refinement parameters for (ED)<sub>4</sub>AgBiX<sub>12</sub>

| Identification code                         | (ED) <sub>4</sub> AgBiBr <sub>12</sub>                             | (ED) <sub>4</sub> AgBiCl <sub>α</sub> Br <sub>12-α</sub>                                | (ED) <sub>4</sub> AgBiCl <sub>α</sub> I <sub>12-α</sub>                                | (ED) <sub>4</sub> AgBiBr <sub>α</sub> I <sub>12-α</sub>                                |
|---------------------------------------------|--------------------------------------------------------------------|-----------------------------------------------------------------------------------------|----------------------------------------------------------------------------------------|----------------------------------------------------------------------------------------|
| Empirical formula                           | C <sub>8</sub> H <sub>40</sub> AgBiBr <sub>12</sub> N <sub>8</sub> | C <sub>8</sub> H <sub>40</sub> AgBiBr <sub>9.47</sub> Cl <sub>2.53</sub> N <sub>8</sub> | C <sub>8</sub> H <sub>40</sub> AgBiCl <sub>2.19</sub> I <sub>9.81</sub> N <sub>8</sub> | C <sub>8</sub> H <sub>40</sub> AgBiBr <sub>3.37</sub> I <sub>8.63</sub> N <sub>8</sub> |
| Formula weight                              | 1524.25                                                            | 1411.76                                                                                 | 1887.85                                                                                | 1929.77                                                                                |
| Temperature/K                               | 100(5)                                                             | 100(5)                                                                                  | 100(5)                                                                                 | 100(5)                                                                                 |
| Crystal system                              | Triclinic                                                          | Triclinic                                                                               | Triclinic                                                                              | Triclinic                                                                              |
| Space group                                 | <i>P</i> $\bar{1}$                                                 | <i>P</i> $\bar{1}$                                                                      | <i>P</i> $\bar{1}$                                                                     | <i>P</i> $\bar{1}$                                                                     |
| a/Å                                         | 8.9996(4)                                                          | 8.8306(5)                                                                               | 9.1764(4)                                                                              | 9.1706(4)                                                                              |
| b/Å                                         | 9.0011(4)                                                          | 8.8403(5)                                                                               | 9.1792(4)                                                                              | 9.2051(4)                                                                              |
| c/Å                                         | 11.2290(5)                                                         | 11.1883(6)                                                                              | 11.8973(6)                                                                             | 11.8688(4)                                                                             |
| α/°                                         | 108.040(2)                                                         | 107.385(2)                                                                              | 94.093(2)                                                                              | 107.4280(10)                                                                           |
| β/°                                         | 94.137(2)                                                          | 94.196(2)                                                                               | 107.241(2)                                                                             | 93.9270(10)                                                                            |
| γ/°                                         | 92.587(2)                                                          | 92.878(2)                                                                               | 91.825(2)                                                                              | 92.3490(10)                                                                            |
| Volume/Å <sup>3</sup>                       | 860.46(7)                                                          | 828.90(8)                                                                               | 953.18(8)                                                                              | 951.69(7)                                                                              |
| Z                                           | 1                                                                  | 1                                                                                       | 1                                                                                      | 1                                                                                      |
| ρ <sub>calc</sub> /cm <sup>3</sup>          | 2.942                                                              | 2.828                                                                                   | 3.289                                                                                  | 3.367                                                                                  |
| μ/mm <sup>-1</sup>                          | 19.621                                                             | 17.523                                                                                  | 13.235                                                                                 | 15.682                                                                                 |
| F(000)                                      | 694.0                                                              | 648.0                                                                                   | 831.0                                                                                  | 849.0                                                                                  |
| Crystal size/mm <sup>3</sup>                | 0.181 × 0.095 × 0.088                                              | 0.120 × 0.088 × 0.071                                                                   | 0.135 × 0.124 × 0.098                                                                  | 0.089 × 0.087 × 0.068                                                                  |
| Radiation                                   | MoKα<br>(λ = 0.71073)                                              | MoKα (λ = 0.71073)                                                                      | MoKα (λ = 0.71073)                                                                     | MoKα (λ = 0.71073)                                                                     |
| 2θ range for data collection/°              | 4.55 to 52.78                                                      | 5.182 to 52.912                                                                         | 4.958 to 52.772                                                                        | 4.946 to 52.766                                                                        |
| Index ranges                                | -11 ≤ h ≤ 11,<br>-11 ≤ k ≤ 10,<br>0 ≤ l ≤ 14                       | -11 ≤ h ≤ 11,<br>-11 ≤ k ≤ 11,<br>-13 ≤ l ≤ 14                                          | -11 ≤ h ≤ 11,<br>-11 ≤ k ≤ 11,<br>-14 ≤ l ≤ 14                                         | -11 ≤ h ≤ 11,<br>-11 ≤ k ≤ 10,<br>0 ≤ l ≤ 14                                           |
| Reflections collected                       | 3416                                                               | 25474                                                                                   | 36182                                                                                  | 3846                                                                                   |
| Independent reflections                     | 3416<br>[R <sub>sigma</sub> = 0.0547]                              | 3397<br>[R <sub>int</sub> = 0.0735,<br>R <sub>sigma</sub> = 0.0423]                     | 3871<br>[R <sub>int</sub> = 0.0497,<br>R <sub>sigma</sub> = 0.0295]                    | 3846<br>[R <sub>sigma</sub> = 0.0381]                                                  |
| Data/restraints/parameters                  | 3416/30/144                                                        | 3397/0/149                                                                              | 3871/6/154                                                                             | 3846/0/148                                                                             |
| Goodness-of-fit on F <sup>2</sup>           | 1.027                                                              | 1.036                                                                                   | 1.114                                                                                  | 1.053                                                                                  |
| Final R indexes [I >= 2σ (I)]               | R <sub>1</sub> = 0.0317,<br>wR <sub>2</sub> = 0.0734               | R <sub>1</sub> = 0.0299,<br>wR <sub>2</sub> = 0.0681                                    | R <sub>1</sub> = 0.0190,<br>wR <sub>2</sub> = 0.0407                                   | R <sub>1</sub> = 0.0286,<br>wR <sub>2</sub> = 0.0581                                   |
| Final R indexes [all data]                  | R <sub>1</sub> = 0.0376,<br>wR <sub>2</sub> = 0.0781               | R <sub>1</sub> = 0.0371,<br>wR <sub>2</sub> = 0.0717                                    | R <sub>1</sub> = 0.0194,<br>wR <sub>2</sub> = 0.0410                                   | R <sub>1</sub> = 0.0306,<br>wR <sub>2</sub> = 0.0593                                   |
| Largest diff. peak/hole / e Å <sup>-3</sup> | 1.38/-1.36                                                         | 2.31/-1.46                                                                              | 0.73/-0.93                                                                             | 1.02/-0.85                                                                             |

Table S3: Summary of key single crystal XRD refinement parameters for (ED)<sub>2</sub>PbX<sub>6</sub> and (R-3AP)<sub>4</sub>CuBiBr<sub>12</sub>

| Identification code                         | (ED) <sub>2</sub> PbBr <sub>2</sub> I <sub>4</sub>                              | (ED) <sub>2</sub> PbCl <sub>2</sub> I <sub>4</sub>                              | (R-3AP) <sub>4</sub><br>CuBiBr <sub>12</sub>                        | (R-3AP) <sub>4</sub><br>CuBiBr <sub>12</sub>                        |
|---------------------------------------------|---------------------------------------------------------------------------------|---------------------------------------------------------------------------------|---------------------------------------------------------------------|---------------------------------------------------------------------|
| Empirical formula                           | C <sub>4</sub> H <sub>20</sub> Br <sub>2</sub> I <sub>4</sub> N <sub>4</sub> Pb | C <sub>4</sub> H <sub>20</sub> Cl <sub>2</sub> I <sub>4</sub> N <sub>4</sub> Pb | C <sub>16</sub> H <sub>48</sub> BiBr <sub>12</sub> CuN <sub>8</sub> | C <sub>16</sub> H <sub>48</sub> BiBr <sub>12</sub> CuN <sub>8</sub> |
| Formula weight                              | 998.85                                                                          | 909.93                                                                          | 1584.06                                                             | 1584.06                                                             |
| Temperature/K                               | 100(5)                                                                          | 100(5)                                                                          | 100(5)                                                              | 420(5)                                                              |
| Crystal system                              | Orthorhombic                                                                    | Monoclinic                                                                      | Monoclinic                                                          | Monoclinic                                                          |
| Space group                                 | <i>Pbcn</i>                                                                     | <i>C2/m</i>                                                                     | <i>P2<sub>1</sub></i>                                               | <i>P2/m</i>                                                         |
| a/Å                                         | 8.8705(10)                                                                      | 8.982(3)                                                                        | 9.2700(4)                                                           | 9.392(9)                                                            |
| b/Å                                         | 9.3316(12)                                                                      | 8.648(4)                                                                        | 23.3775(13)                                                         | 9.449(11)                                                           |
| c/Å                                         | 23.161(3)                                                                       | 12.608(6)                                                                       | 9.2708(4)                                                           | 12.894(14)                                                          |
| α/°                                         | 90                                                                              | 90                                                                              | 90                                                                  | 90                                                                  |
| β/°                                         | 90                                                                              | 104.270(9)                                                                      | 92.320(2)                                                           | 111.37(2)                                                           |
| γ/°                                         | 90                                                                              | 90                                                                              | 90                                                                  | 90                                                                  |
| Volume/Å <sup>3</sup>                       | 1917.1(4)                                                                       | 949.1(7)                                                                        | 2007.42(17)                                                         | 1066(2)                                                             |
| Z                                           | 4                                                                               | 2                                                                               | 2                                                                   | 1                                                                   |
| ρ <sub>calc</sub> /cm <sup>3</sup>          | 3.461                                                                           | 3.184                                                                           | 2.621                                                               | 2.468                                                               |
| μ/mm <sup>-1</sup>                          | 19.395                                                                          | 15.659                                                                          | 16.872                                                              | 15.890                                                              |
| F(000)                                      | 1744.0                                                                          | 800.0                                                                           | 1464.0                                                              | 732.0                                                               |
| Crystal size/mm <sup>3</sup>                | 0.160 × 0.144 × 0.020                                                           | 0.100 × 0.048 × 0.021                                                           | 0.205 × 0.204 × 0.091                                               | 0.156 × 0.107 × 0.068                                               |
| Radiation                                   | MoKα (λ = 0.71073)                                                              | MoKα (λ = 0.71073)                                                              | MoKα (λ = 0.71073)                                                  | MoKα (λ = 0.71073)                                                  |
| 2θ range for data collection/°              | 5.786 to 49.424                                                                 | 6.642 to 49.436                                                                 | 5.228 to 51.436                                                     | 5.486 to 34.38                                                      |
| Index ranges                                | -10 ≤ h ≤ 10,<br>-10 ≤ k ≤ 10,<br>-26 ≤ l ≤ 27                                  | -9 ≤ h ≤ 10,<br>-10 ≤ k ≤ 10,<br>-14 ≤ l ≤ 14                                   | -11 ≤ h ≤ 11,<br>-28 ≤ k ≤ 28,<br>-11 ≤ l ≤ 11                      | -7 ≤ h ≤ 7,<br>-7 ≤ k ≤ 7,<br>-10 ≤ l ≤ 10                          |
| Reflections collected                       | 10749                                                                           | 3608                                                                            | 20549                                                               | 5240                                                                |
| Independent reflections                     | 1959<br>[R <sub>int</sub> = 0.1053,<br>R <sub>sigma</sub> = 0.0611]             | 872<br>[R <sub>int</sub> = 0.0821,<br>R <sub>sigma</sub> = 0.0661]              | 7605<br>[R <sub>int</sub> = 0.0721,<br>R <sub>sigma</sub> = 0.0886] | 695<br>[R <sub>int</sub> = 0.0628,<br>R <sub>sigma</sub> = 0.0457]  |
| Data/restraints/parameters                  | 1959/15/71                                                                      | 872/45/65                                                                       | 7605/277/348                                                        | 695/40/57                                                           |
| Goodness-of-fit on F <sup>2</sup>           | 1.022                                                                           | 1.167                                                                           | 1.016                                                               | 1.124                                                               |
| Final R indexes [I >= 2σ (I)]               | R <sub>1</sub> = 0.0419,<br>wR <sub>2</sub> = 0.0985                            | R <sub>1</sub> = 0.0469,<br>wR <sub>2</sub> = 0.0962                            | R <sub>1</sub> = 0.0445,<br>wR <sub>2</sub> = 0.0887                | R <sub>1</sub> = 0.0731,<br>wR <sub>2</sub> = 0.2095                |
| Final R indexes [all data]                  | R <sub>1</sub> = 0.0549,<br>wR <sub>2</sub> = 0.110                             | R <sub>1</sub> = 0.0539,<br>wR <sub>2</sub> = 0.1017                            | R <sub>1</sub> = 0.0569,<br>wR <sub>2</sub> = 0.0936                | R <sub>1</sub> = 0.0868,<br>wR <sub>2</sub> = 0.2337                |
| Largest diff. peak/hole / e Å <sup>-3</sup> | 1.14/-1.47                                                                      | 1.56/-1.70                                                                      | 1.19/-1.41                                                          | 1.16/-0.55                                                          |

Table S4: Summary of key single crystal XRD refinement parameters for (R-3AP)CuBiX<sub>12</sub>

| Identification code                                             | (R-3AP) <sub>4</sub><br>CuBiCl <sub>4</sub> I <sub>8</sub>                         | (R-3AP) <sub>4</sub><br>CuBiBr <sub>4</sub> I <sub>8</sub>                         | (S-3AP) <sub>4</sub><br>CuBiBr <sub>12</sub>                                       | (3AP) <sub>4</sub> CuBiBr <sub>12</sub>                             |
|-----------------------------------------------------------------|------------------------------------------------------------------------------------|------------------------------------------------------------------------------------|------------------------------------------------------------------------------------|---------------------------------------------------------------------|
| Empirical formula                                               | C <sub>16</sub> H <sub>48</sub> BiCl <sub>4</sub> CuI <sub>8</sub> N <sub>8</sub>  | C <sub>16</sub> H <sub>47</sub> BiBr <sub>4</sub> CuI <sub>8</sub> N <sub>8</sub>  | C <sub>16</sub> H <sub>48</sub> BiBr <sub>12</sub> CuN <sub>8</sub>                | C <sub>16</sub> H <sub>38</sub> BiBr <sub>12</sub> CuN <sub>8</sub> |
| Formula weight                                                  | 1782.14                                                                            | 1958.97                                                                            | 1584.06                                                                            | 1573.98                                                             |
| Temperature/K                                                   | 100(5)                                                                             | 100(5)                                                                             | 100(5)                                                                             | 100(5)                                                              |
| Crystal system                                                  | Monoclinic                                                                         | Orthorhombic                                                                       | Monoclinic                                                                         | Triclinic                                                           |
| Space group                                                     | <i>C</i> 2                                                                         | <i>P</i> 222 <sub>1</sub>                                                          | <i>P</i> 2 <sub>1</sub>                                                            | <i>P</i> $\bar{1}$                                                  |
| <i>a</i> /Å                                                     | 21.9681(10)                                                                        | 9.5241(7)                                                                          | 9.2586(4)                                                                          | 9.214(3)                                                            |
| <i>b</i> /Å                                                     | 10.2048(5)                                                                         | 9.5438(6)                                                                          | 23.3644(11)                                                                        | 9.284(3)                                                            |
| <i>c</i> /Å                                                     | 9.4303(4)                                                                          | 47.395(3)                                                                          | 9.2764(4)                                                                          | 12.255(3)                                                           |
| $\alpha$ /°                                                     | 90                                                                                 | 90                                                                                 | 90                                                                                 | 105.567(10)                                                         |
| $\beta$ /°                                                      | 90.175(2)                                                                          | 90                                                                                 | 92.358(2)                                                                          | 96.256(9)                                                           |
| $\gamma$ /°                                                     | 90                                                                                 | 90                                                                                 | 90                                                                                 | 92.093(10)                                                          |
| Volume/Å <sup>3</sup>                                           | 2114.08(17)                                                                        | 4308.0(5)                                                                          | 2004.99(15)                                                                        | 1001.4(5)                                                           |
| <i>Z</i>                                                        | 2                                                                                  | 4                                                                                  | 2                                                                                  | 1                                                                   |
| $\rho_{\text{calc}}$ /g/cm <sup>3</sup>                         | 2.800                                                                              | 3.020                                                                              | 2.624                                                                              | 2.610                                                               |
| $\mu$ /mm <sup>-1</sup>                                         | 10.776                                                                             | 14.038                                                                             | 16.893                                                                             | 16.910                                                              |
| <i>F</i> (000)                                                  | 1608.0                                                                             | 3500.0                                                                             | 1464.0                                                                             | 722.0                                                               |
| Crystal size/mm <sup>3</sup>                                    | 0.12 × 0.081 ×<br>0.056                                                            | 0.092 × 0.048 ×<br>0.028                                                           | 0.148 × 0.121 ×<br>0.105                                                           | 0.233 × 0.141 ×<br>0.125                                            |
| Radiation                                                       | MoK $\alpha$ ( $\lambda$ = 0.71073)                                                |                                                                                    | MoK $\alpha$ ( $\lambda$ =<br>0.71073)                                             | MoK $\alpha$ ( $\lambda$ =<br>0.71073)                              |
| 2 $\theta$ range for data<br>collection/°                       | 6.164 to 52.79                                                                     | 4.296 to 49.446                                                                    | 4.394 to 52.83                                                                     | 5.984 to 49.446                                                     |
| Index ranges                                                    | -26 ≤ <i>h</i> ≤ 27,<br>-12 ≤ <i>k</i> ≤ 12,<br>-11 ≤ <i>l</i> ≤ 11                | -11 ≤ <i>h</i> ≤ 10,<br>-11 ≤ <i>k</i> ≤ 11,<br>-55 ≤ <i>l</i> ≤ 55                | -11 ≤ <i>h</i> ≤ 11,<br>-29 ≤ <i>k</i> ≤ 29,<br>-11 ≤ <i>l</i> ≤ 11                | -10 ≤ <i>h</i> ≤ 10,<br>-10 ≤ <i>k</i> ≤ 10,<br>0 ≤ <i>l</i> ≤ 14   |
| Reflections collected                                           | 13352                                                                              | 43153                                                                              | 47482                                                                              | 3378                                                                |
| Independent reflections                                         | 4154<br>[ <i>R</i> <sub>int</sub> = 0.0525, <i>R</i> <sub>sigma</sub><br>= 0.0704] | 7322<br>[ <i>R</i> <sub>int</sub> = 0.0757,<br><i>R</i> <sub>sigma</sub> = 0.0607] | 8249<br>[ <i>R</i> <sub>int</sub> = 0.1030,<br><i>R</i> <sub>sigma</sub> = 0.0796] | 3378<br>[ <i>R</i> <sub>sigma</sub> = 0.0923]                       |
| Data/restraints/<br>parameters                                  | 4154/79/176                                                                        | 7322/246/376                                                                       | 8249/166/348                                                                       | 3378/78/178                                                         |
| Goodness-of-fit on <i>F</i> <sup>2</sup>                        | 1.044                                                                              | 1.050                                                                              | 1.018                                                                              | 1.034                                                               |
| Final <i>R</i> indexes<br>[ <i>I</i> ≥ 2 $\sigma$ ( <i>I</i> )] | <i>R</i> <sub>1</sub> = 0.0400,<br>w <i>R</i> <sub>2</sub> = 0.0713                | <i>R</i> <sub>1</sub> = 0.0704,<br>w <i>R</i> <sub>2</sub> = 0.1646                | <i>R</i> <sub>1</sub> = 0.0447,<br>w <i>R</i> <sub>2</sub> = 0.0829                | <i>R</i> <sub>1</sub> = 0.0678,<br>w <i>R</i> <sub>2</sub> = 0.1355 |
| Final <i>R</i> indexes<br>[all data]                            | <i>R</i> <sub>1</sub> = 0.0515,<br>w <i>R</i> <sub>2</sub> = 0.0765                | <i>R</i> <sub>1</sub> = 0.0758,<br>w <i>R</i> <sub>2</sub> = 0.1680                | <i>R</i> <sub>1</sub> = 0.0701,<br>w <i>R</i> <sub>2</sub> = 0.0903                | <i>R</i> <sub>1</sub> = 0.1074,<br>w <i>R</i> <sub>2</sub> = 0.1575 |
| Largest diff. peak/hole /<br>e Å <sup>-3</sup>                  | 1.38/-2.35                                                                         | 2.69/-2.14                                                                         | 1.65/-1.06                                                                         | 1.79/-1.60                                                          |

Table S5: Summary of key single crystal XRD refinement parameters for (R-3AP)AgBiX<sub>12</sub>

| Identification code                            | (R-3AP) <sub>4</sub><br>AgBiBr <sub>12</sub>                        | (R-3AP) <sub>4</sub><br>AgBiCl <sub>α</sub> Br <sub>12-α</sub>        | (R-3AP) <sub>4</sub><br>AgBiBr <sub>4</sub> I <sub>8</sub>           | (S-3AP) <sub>4</sub><br>AgBiBr <sub>12</sub>                        | (3AP) <sub>4</sub> AgBiBr <sub>12</sub>                             |
|------------------------------------------------|---------------------------------------------------------------------|-----------------------------------------------------------------------|----------------------------------------------------------------------|---------------------------------------------------------------------|---------------------------------------------------------------------|
| Empirical formula                              | C <sub>16</sub> H <sub>48</sub> AgBiBr <sub>12</sub> N <sub>8</sub> | C <sub>16</sub> H <sub>48</sub> AgBiBr <sub>12</sub> N <sub>8</sub> C | C <sub>16</sub> H <sub>48</sub> AgBiBr <sub>4</sub> I <sub>8</sub> N | C <sub>16</sub> H <sub>48</sub> AgBiBr <sub>12</sub> N <sub>8</sub> | C <sub>16</sub> H <sub>48</sub> AgBiBr <sub>12</sub> N <sub>8</sub> |
| Formula weight                                 | 1628.39                                                             | 1663.84                                                               | 2004.31                                                              | 1628.39                                                             | 1628.39                                                             |
| Temperature/K                                  | 100(5)                                                              | 100(5)                                                                | 100(5)                                                               | 100(5)                                                              | 100(5)                                                              |
| Crystal system                                 | Triclinic                                                           | Triclinic                                                             | Monoclinic                                                           | Triclinic                                                           | Triclinic                                                           |
| Space group                                    | <i>P</i> 1                                                          | <i>P</i> 1                                                            | <i>P</i> 2 <sub>1</sub>                                              | <i>P</i> 1                                                          | <i>P</i> $\bar{1}$                                                  |
| a/Å                                            | 8.9959(4)                                                           | 8.9634(5)                                                             | 9.7952(4)                                                            | 9.0025(10)                                                          | 9.1349(4)                                                           |
| b/Å                                            | 9.3753(3)                                                           | 9.2927(4)                                                             | 10.3654(4)                                                           | 9.3800(9)                                                           | 9.2332(4)                                                           |
| c/Å                                            | 12.1528(5)                                                          | 12.0715(7)                                                            | 21.6851(6)                                                           | 12.1558(14)                                                         | 12.2348(5)                                                          |
| α/°                                            | 96.252(2)                                                           | 96.259(2)                                                             | 90                                                                   | 96.258(4)                                                           | 96.096(2)                                                           |
| β/°                                            | 104.273(2)                                                          | 104.335(2)                                                            | 90.0580(10)                                                          | 104.285(4)                                                          | 104.644(2)                                                          |
| γ/°                                            | 91.349(2)                                                           | 91.315(2)                                                             | 90                                                                   | 91.315(3)                                                           | 92.070(2)                                                           |
| Volume/Å <sup>3</sup>                          | 986.06(7)                                                           | 967.07(9)                                                             | 2201.71(14)                                                          | 987.49(19)                                                          | 990.64(7)                                                           |
| Z                                              | 1                                                                   | 1                                                                     | 2                                                                    | 1                                                                   | 1                                                                   |
| ρ <sub>calc</sub> /g/cm <sup>3</sup>           | 2.742                                                               | 2.857                                                                 | 3.023                                                                | 2.738                                                               | 2.730                                                               |
| μ/mm <sup>-1</sup>                             | 17.132                                                              | 17.538                                                                | 13.696                                                               | 17.107                                                              | 17.053                                                              |
| F(000)                                         | 750.0                                                               | 767.0                                                                 | 1788.0                                                               | 750.0                                                               | 750.0                                                               |
| Crystal size/mm <sup>3</sup>                   | 0.136 × 0.10 ×<br>0.069                                             | 0.277 × 0.156 ×<br>0.126                                              | 0.226 × 0.173 ×<br>0.117                                             | 0.387 × 0.286 ×<br>0.28                                             | 0.20 × 0.15 ×<br>0.12                                               |
| Radiation                                      | MoKα (λ =<br>0.71073)                                               | MoKα (λ = 0.71073)                                                    | MoKα (λ =<br>0.71073)                                                | MoKα (λ =<br>0.71073)                                               | MoKα (λ =<br>0.71073)                                               |
| 2θ range for data<br>collection/°              | 5.908 to 52.776                                                     | 5.304 to 49.502                                                       | 3.93 to 52.814                                                       | 5.26 to 49.462                                                      | 5.956 to 52.784                                                     |
| Index ranges                                   | -11 ≤ h ≤ 11,<br>-11 ≤ k ≤ 11,<br>-15 ≤ l ≤ 15                      | -10 ≤ h ≤ 10,<br>-10 ≤ k ≤ 10,<br>-14 ≤ l ≤ 14                        | -12 ≤ h ≤ 12,<br>-12 ≤ k ≤ 12,<br>-27 ≤ l ≤ 27                       | -10 ≤ h ≤ 10,<br>-11 ≤ k ≤ 11,<br>-14 ≤ l ≤ 14                      | -11 ≤ h ≤ 11,<br>-11 ≤ k ≤ 11,<br>-15 ≤ l ≤ 15                      |
| Reflections<br>collected                       | 42237                                                               | 33068                                                                 | 21587                                                                | 29864                                                               | 29936                                                               |
| Independent<br>reflections                     | 7978<br>[R <sub>int</sub> = 0.0554,<br>R <sub>sigma</sub> = 0.0442] | 6459<br>[R <sub>int</sub> = 0.0651,<br>R <sub>sigma</sub> = 0.0505]   | 8720<br>[R <sub>int</sub> = 0.0556,<br>R <sub>sigma</sub> = 0.0777]  | 6506<br>[R <sub>int</sub> = 0.0701,<br>R <sub>sigma</sub> = 0.0615] | 4050<br>[R <sub>int</sub> = 0.0604,<br>R <sub>sigma</sub> = 0.0325] |
| Data/restraints/para<br>meters                 | 7978/3/347                                                          | 6459/159/331                                                          | 8720/157/348                                                         | 6506/48/348                                                         | 4050/104/178                                                        |
| Goodness-of-fit on<br>F <sup>2</sup>           | 0.948                                                               | 1.070                                                                 | 1.033                                                                | 1.017                                                               | 1.042                                                               |
| Final R indexes<br>[I >= 2σ (I)]               | R <sub>1</sub> = 0.0218,<br>wR <sub>2</sub> = 0.0399                | R <sub>1</sub> = 0.0390,<br>wR <sub>2</sub> = 0.1014                  | R <sub>1</sub> = 0.0345,<br>wR <sub>2</sub> = 0.0761                 | R <sub>1</sub> = 0.0352,<br>wR <sub>2</sub> = 0.0867                | R <sub>1</sub> = 0.0455,<br>wR <sub>2</sub> = 0.1172                |
| Final R indexes [all<br>data]                  | R <sub>1</sub> = 0.0239,<br>wR <sub>2</sub> = 0.0405                | R <sub>1</sub> = 0.0419,<br>wR <sub>2</sub> = 0.1030                  | R <sub>1</sub> = 0.0354,<br>wR <sub>2</sub> = 0.0767                 | R <sub>1</sub> = 0.0376,<br>wR <sub>2</sub> = 0.0879                | R <sub>1</sub> = 0.0550,<br>wR <sub>2</sub> = 0.1229                |
| Largest diff.<br>peak/hole / e Å <sup>-3</sup> | 0.99/-0.81                                                          | 3.68/-1.46                                                            | 1.60/-1.82                                                           | 2.32/-2.23                                                          | 2.15/-1.76                                                          |

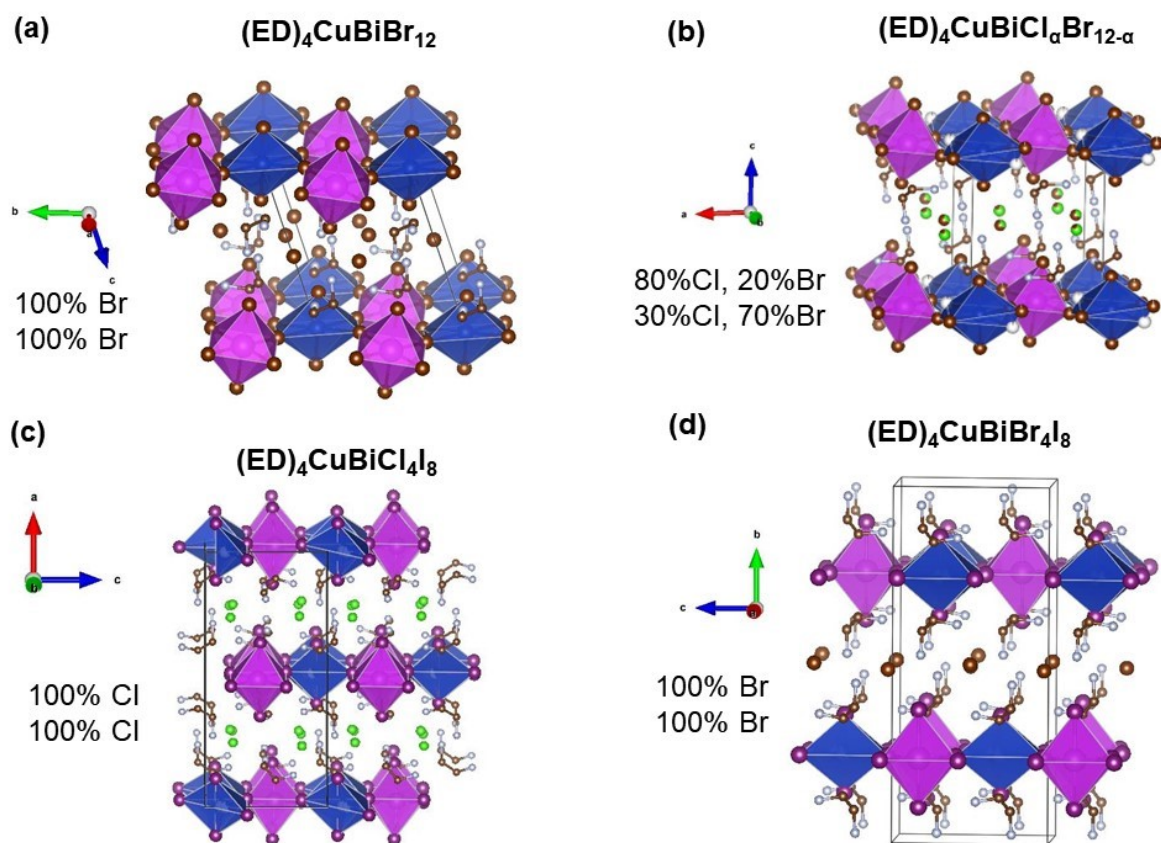

Figure S1: Schematic diagrams of the family of  $(ED)_4CuBiX_{12}$ . The interlayer halide site occupancy factors are as indicated.

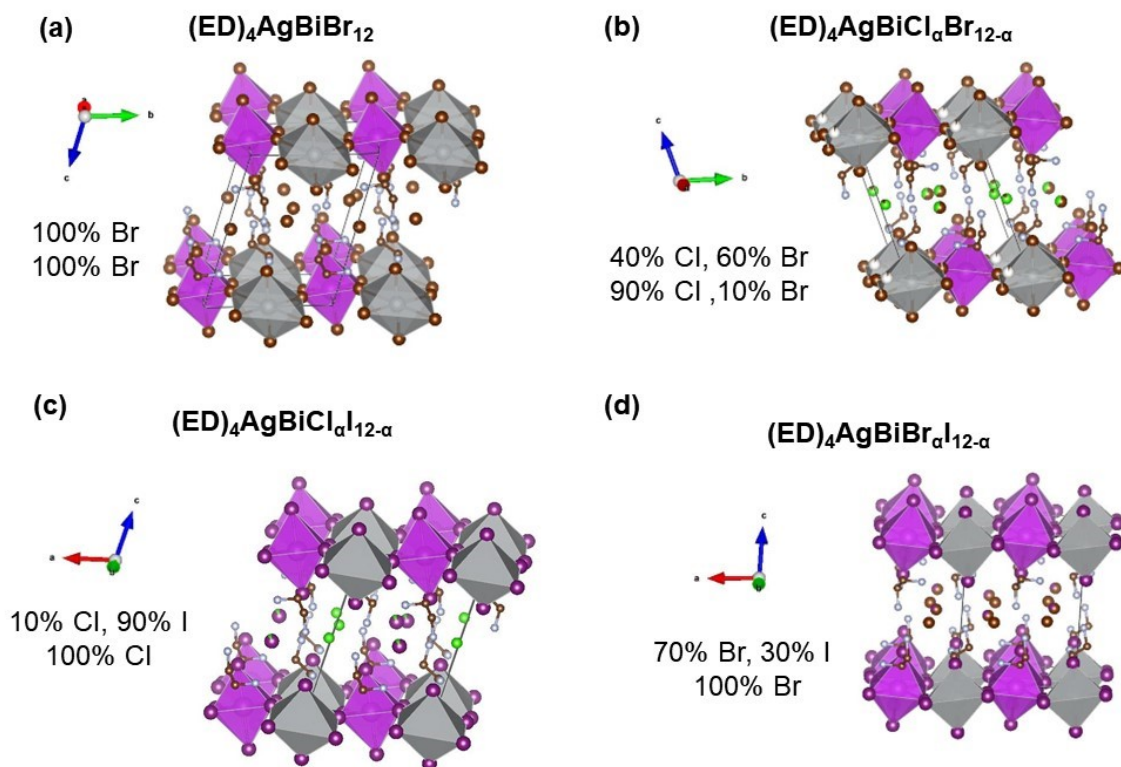

Figure S2: Schematic diagrams of the family of  $(ED)_4AgBiX_{12}$ . The interlayer halide site occupancy factors are as indicated.

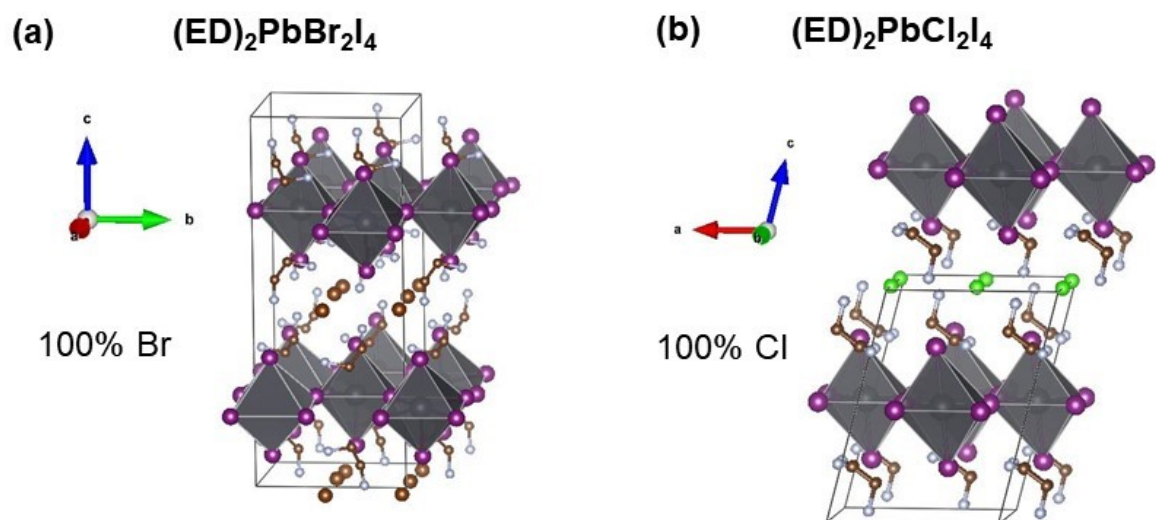

Figure S3: Schematic diagrams of the family of  $(ED)_2PbX_6$ . The interlayer halide site occupancy factors are as indicated.

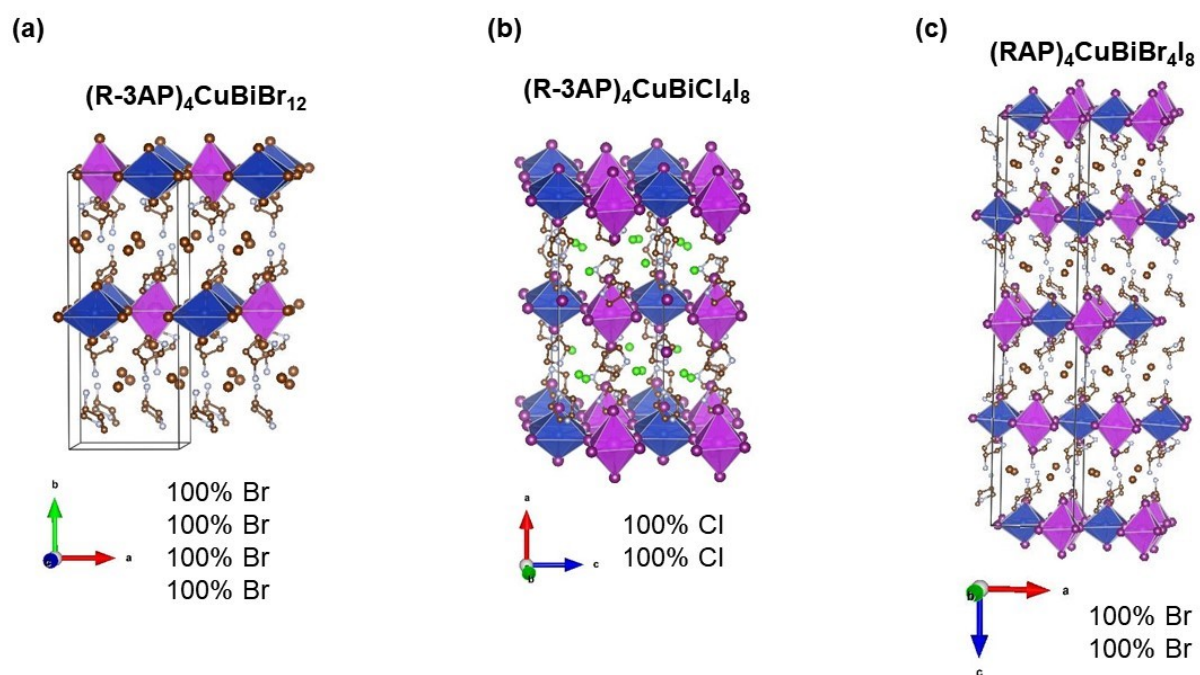

Figure S4: Schematic diagrams of the family of  $(R-3AP)_4CuBiX_{12}$ . The interlayer halide site occupancy factors are as indicated.



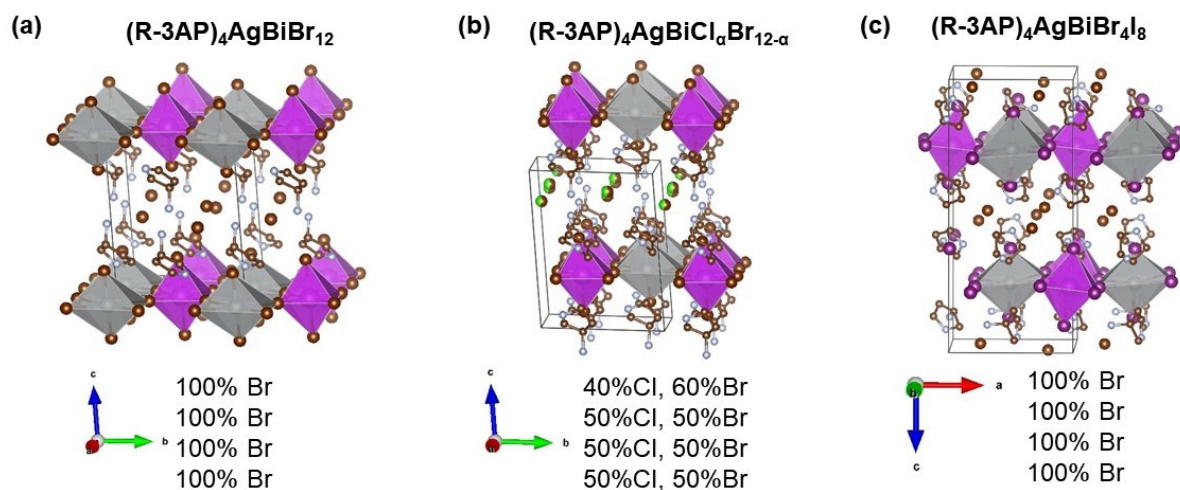

Figure S5: Schematic diagrams of the family of  $(R-3AP)_4AgBiX_{12}$ . The interlayer halide site occupancy factors are as indicated.

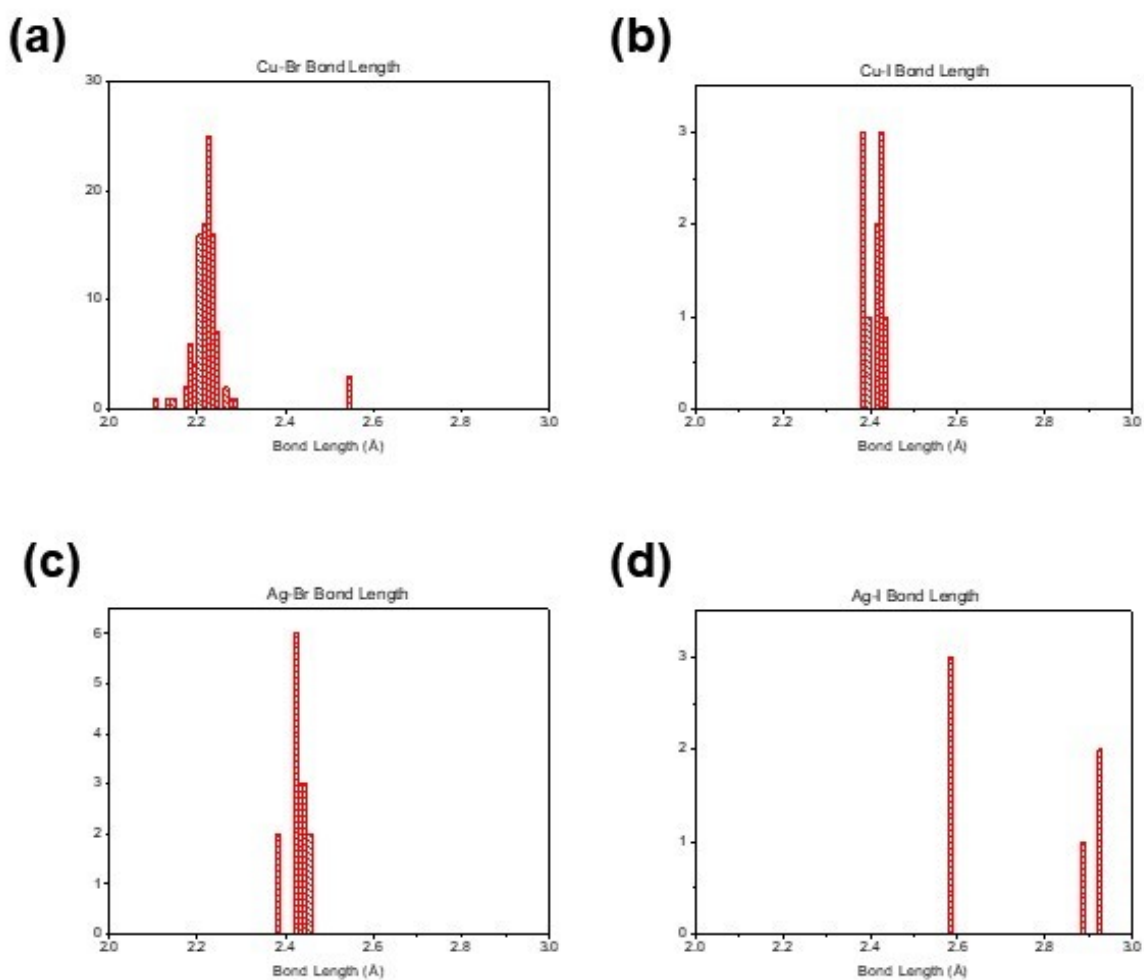

Figure S6: A histogram of the reported bond lengths of (a) Cu-Br, (b) Cu-I, (c) Ag-Br and (d) Ag-I as extracted from the CCDC database.

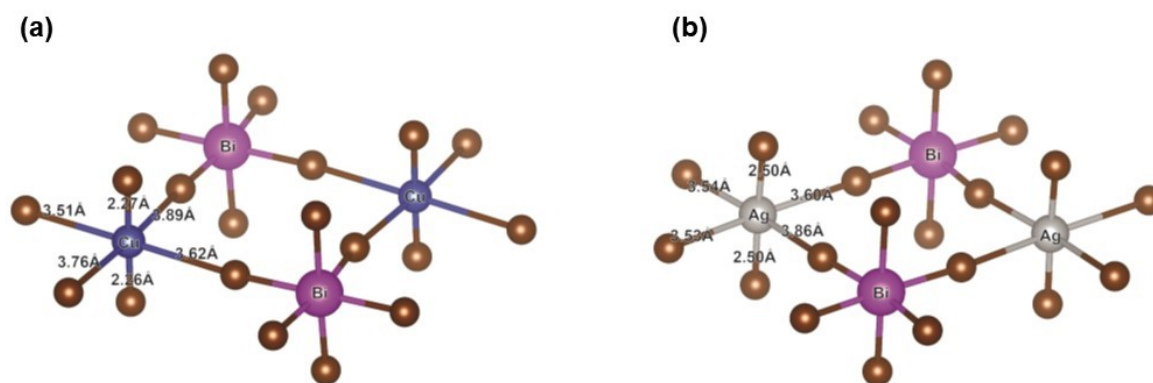

Figure S7: Bond lengths of the axial and equatorial bonds of CuBr and AgBr octahedra. It can be seen clearly that the equatorial bond lengths are all significantly longer than the axial bond lengths and also much larger than those found in other systems that are reported in the CCDC database.

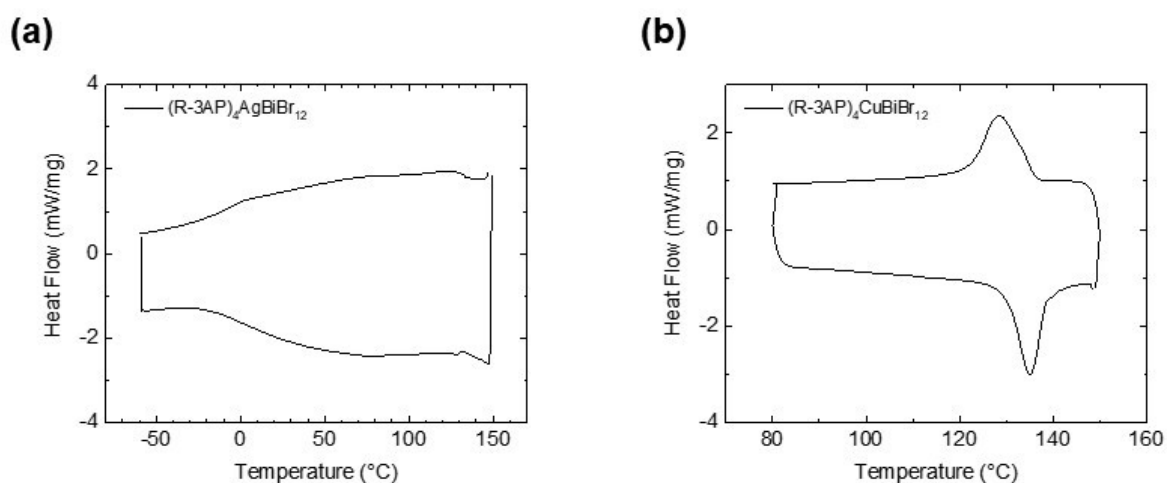

Figure S8: Differential Scanning Calorimetry (DSC) results of (a)  $(R-3AP)_4AgBiBr_{12}$  and (b)  $(R-3AP)_4CuBiBr_{12}$ . A clear phase transition can be seen in  $(R-3AP)_4CuBiBr_{12}$  at around 138 °C indicating that a ferroelectric to paraelectric phase transition has taken place.

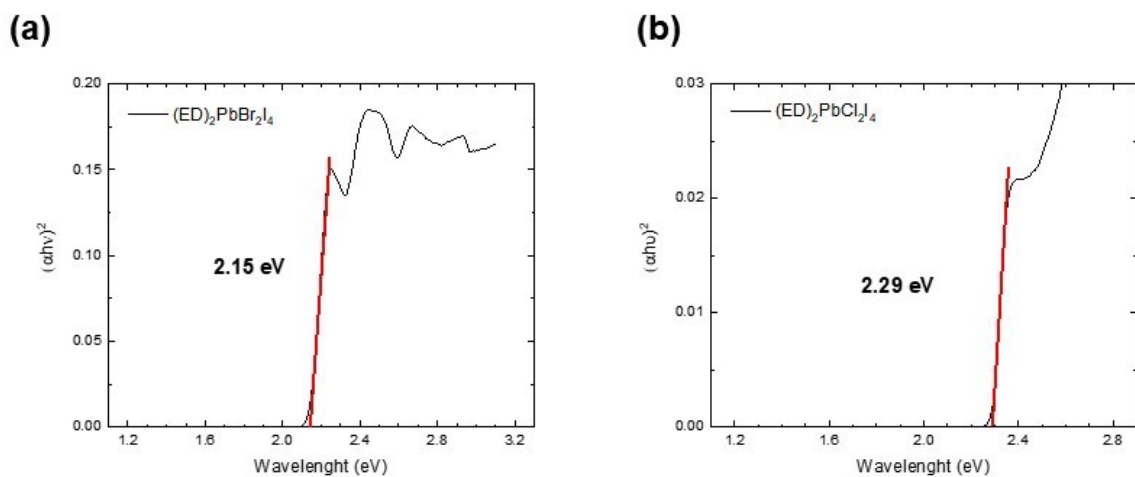

Figure S9: Tauc plot of (a)  $(\text{ED})_2\text{PbBr}_2\text{I}_4$  and (b)  $(\text{ED})_2\text{PbCl}_2\text{I}_4$ .

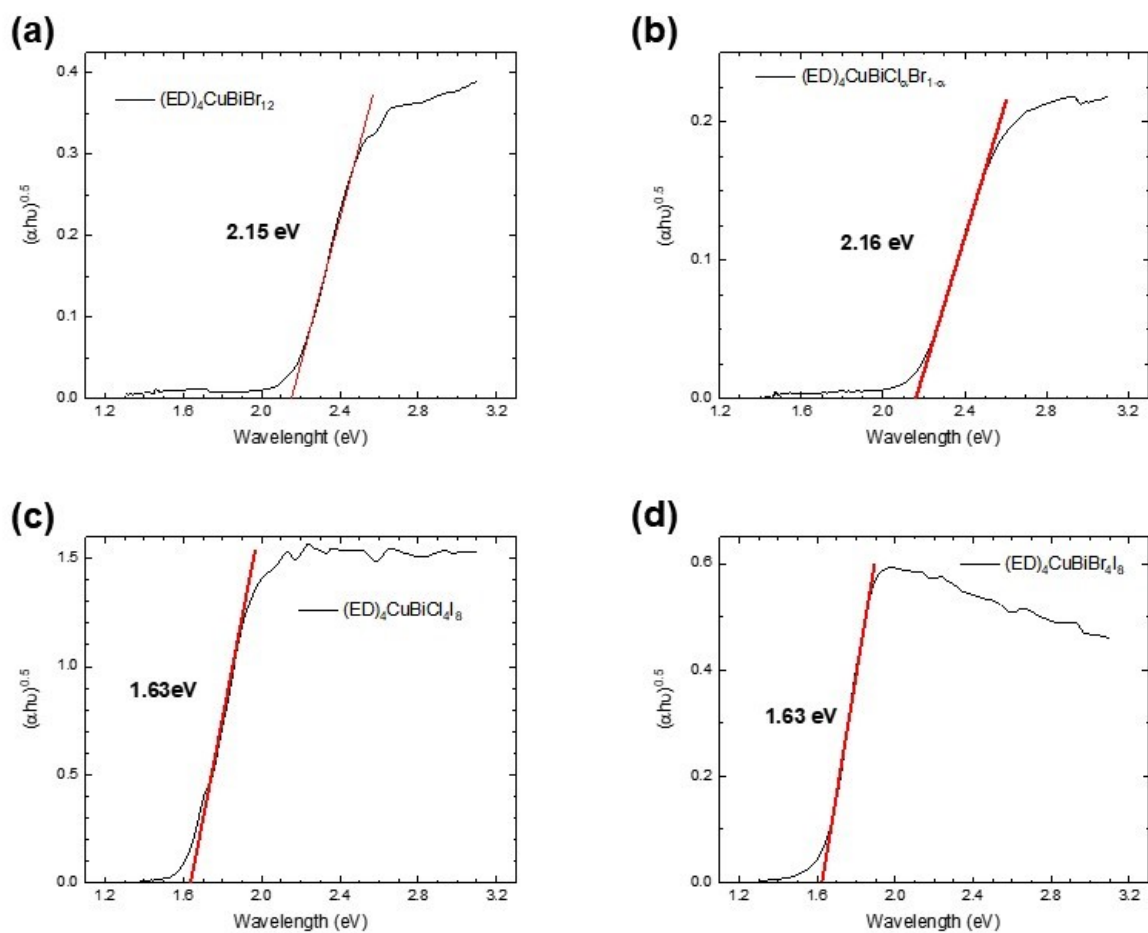

Figure S10: Tauc plot of the  $(\text{ED})_4\text{CuBiX}_{12}$  family.

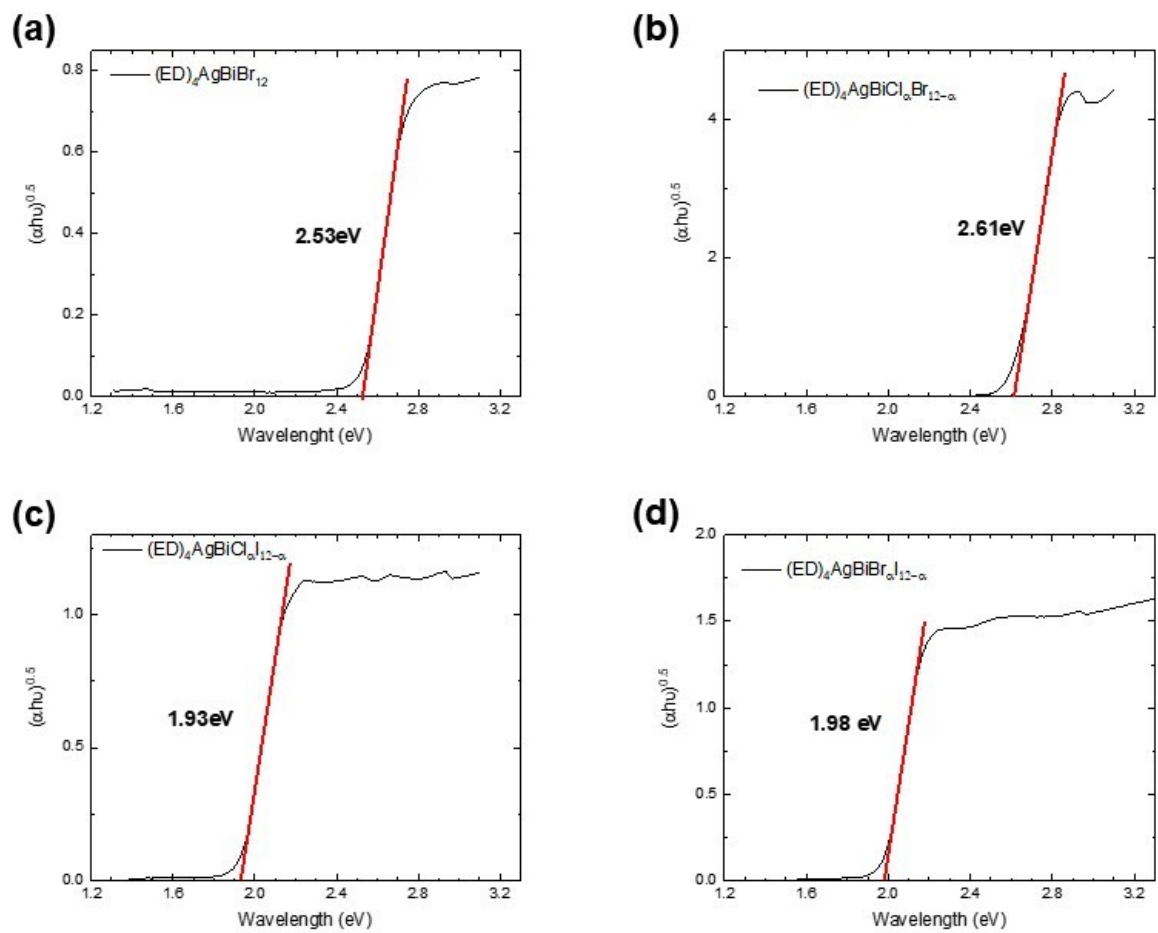

Figure S11: Tauc plot of the  $(ED)_4AgBiX_{12}$  family.

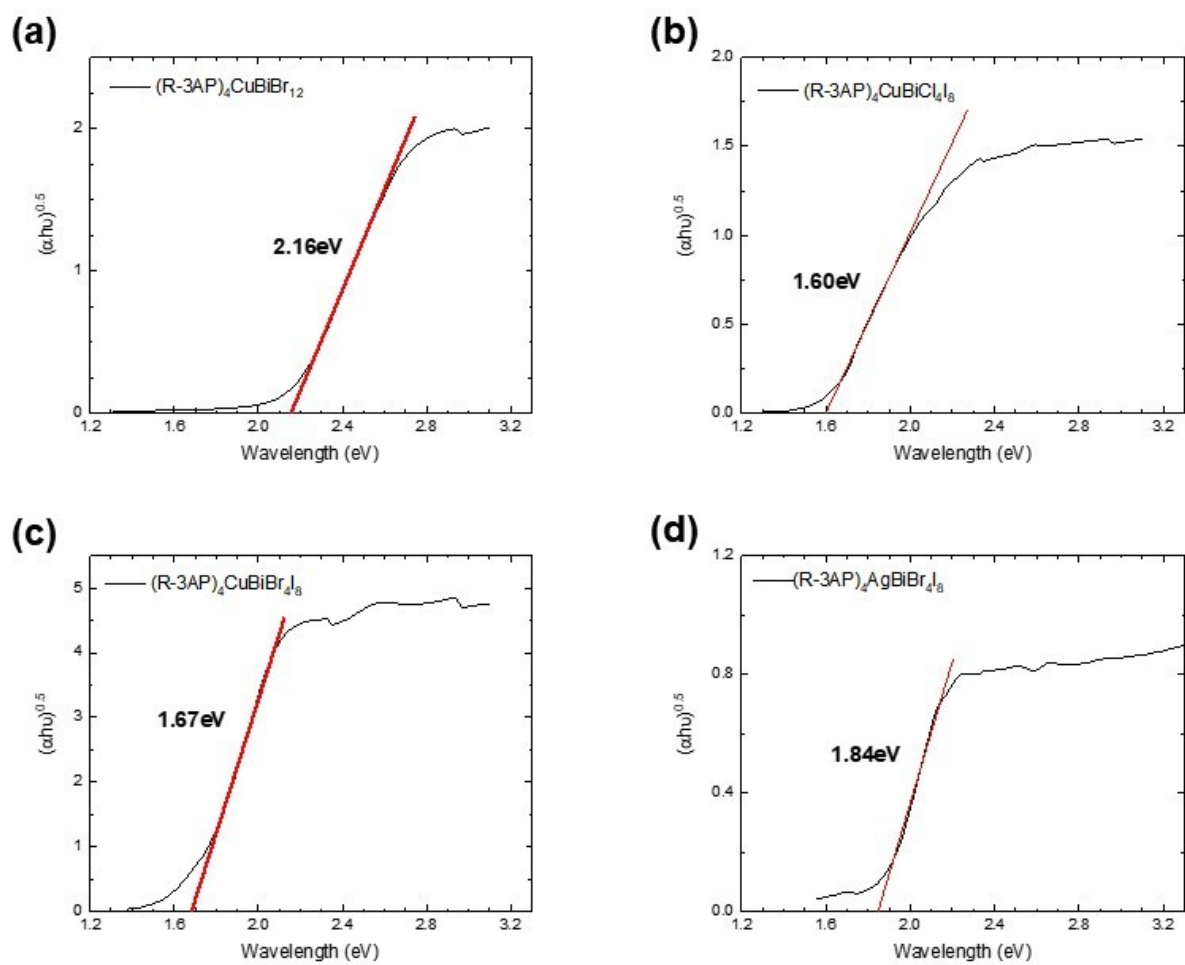

Figure S12: Tauc plot of the (R-3AP)<sub>4</sub>CuBiX<sub>12</sub> family and (R-3AP)<sub>4</sub>AgBiBr<sub>4</sub>I<sub>6</sub>.
